# Supplementary material for: High-frequency NO 3 − isotope ( δ 15 N, δ 18 O) patterns in groundwater recharge reveal that short-term changes in land use and precipitation influence nitrate contamination trends
Source: Copernicus journal article supplement (doi:10.5194/hess-22-4267-2018), 2018-08-13
Supplement: Supplementary file 1 [file hess-22-4267-2018-supplement.zip]

Archive with 2 entries (2 files):
- Table S1.xlsx
- hess-22-4267-2018-supplement-title-page.pdf
