# Supplementary material for: High-frequency NO 3 − isotope ( δ 15 N, δ 18 O) patterns in groundwater recharge reveal that short-term changes in land use and precipitation influence nitrate contamination trends
Source: Copernicus journal article supplement (doi:10.5194/hess-22-4267-2018), 2018-08-13
Supplement: Supplementary file 1 [file hess-22-4267-2018-supplement.zip › hess-22-4267-2018-supplement-title-page.pdf]

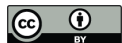

## *Supplement of*

# **High-frequency $\text{NO}_3^-$ isotope ( $\delta^{15}\text{N}$ , $\delta^{18}\text{O}$ ) patterns in groundwater recharge reveal that short-term changes in land use and precipitation influence nitrate contamination trends**

**Martin Suchy et al.**

*Correspondence to:* Leonard I. Wassenaar ([l.wassenaar@iaea.org](mailto:l.wassenaar@iaea.org))

- [hess-22-4267-2018-supplement-title-page.pdf](#)
- [Table S1.xlsx](#)

The copyright of individual parts of the supplement might differ from the CC BY 4.0 License.
