# Supplementary material for: High-frequency NO 3 − isotope ( δ 15 N, δ 18 O) patterns in groundwater recharge reveal that short-term changes in land use and precipitation influence nitrate contamination trends
Source: Copernicus journal article supplement (doi:10.5194/hess-22-4267-2018), 2018-08-13
Supplement: Supplementary file 1 [file hess-22-4267-2018-supplement.zip › Table S1.xlsx]

## Sheet: Supplementary Table
Table S1. Isotopic and geochemical sampling data for the Abbotsford Sumas aquifer.
ID	Date	WL	DO	Cl	NO3	d15N	d18O	ID	Date	WL	DO	Cl	NO3	d15N	d18O	ID	Date	WL	DO	Cl	NO3	d15N	d18O	ID	Date	WL	DO	Cl	NO3	d15N	d18O	ID	Date	WL	DO	Cl	NO3	d15N	d18O	ID	Date	WL	DO	Cl	NO3	d15N	d18O	ID	Date
91-03	2008-08-12 14:13:00	43.653	9.74	6.3	15.7	6.02077	-3.36686	91-07	2008-08-12 12:30:00	43.132	11.09	4.8	13	3.36081	-5.02727	91-10	2008-08-11 12:43:00	47.022	8.43	9.7	29.5	13.2012	-2.55264	91-15	2008-08-14 12:38:00	41.818	9.27	10.6	11	8.50388	-0.162074	94Q-14	2008-08-11 10:18:00	49.426	8.9	4.7	7.06			ABB-02	2008-08-13 15:25:00	45.68	7.54	18	14.9	7.73536	-3.34841	ABB-03	2008-08-12 11:34:00
91-03	2008-09-24 15:32:00	43.305		4.4	14.9	6.07177	-3.07374	91-07	2008-09-17 11:55:00	42.8		4.5	13.9	4.03009	-3.15951	91-10	2008-09-16 12:46:00	46.676	10.86	11.2	25.2	13.1025	-2.86639	91-15	2008-09-18 14:45:00	41.804		10.6	11.7	8.45071	-1.42467	94Q-14	2008-09-16 09:50:00	49.193	10.75	4.4	6.4			ABB-02	2008-09-17 13:40:00	45.534	10.01	19	17	8.27616	-4.40767	ABB-03	2008-09-17 11:21:00
91-03	2008-10-16 09:48:00	43.091		5.8	14.5	6.2566	-2.54459	91-07	2008-10-16 10:18:00	42.572		4.7	15	4.39423	-2.74411	91-10	2008-10-15 11:51:00	45.906		11.3	25.9	12.6327	-2.41192	91-15	2008-10-21 13:32:00	41.85		10.9	12.8	8.59063	-1.32022	94Q-14	2008-10-15 09:51:00	48.971		4.6	6.8			ABB-02	2008-10-16 11:54:00	45.402	11.34	22	16.5	8.09229	-4.74753	ABB-03	2008-10-15 15:33:00
91-03	2008-11-25 14:35:00	42.946		4.7	13	6.38783	-2.78892	91-07	2008-11-15 14:35:00	42.406						91-10	2008-11-12 10:20:00	46.52		10.9	24.1	11.956	-2.56991	91-15	2008-11-12 15:06:00	42.868		10.4	13.8	8.58218	-1.77381	94Q-14	2008-11-17 09:16:00	49.585		4.3	7.28			ABB-02	2008-11-12 11:20:00	45.82	11.74	15.5	13.2	7.66927	-4.26177	ABB-03	2008-11-20 10:21:00
91-03	2008-12-17 10:47:00	43.225		5.3	16.7	6.70211	-1.95053	91-07	2008-12-15 14:09:00	42.65		4.6	13.5	4.2788	-2.90975	91-10	2008-12-17 11:17:00	47.564		7.3	23.5	9.55612	-0.17876	91-15	2008-12-22 13:17:00	43.207		10.1	12.1	8.05524	-1.05725	94Q-14	2008-12-15 09:32:00	49.836		4.4	6.9			ABB-02	2008-12-17 12:42:00	46.41	11.69	19.8	15	7.64681	-6.31836	ABB-03	2008-12-17 10:19:00
91-03	2009-01-12 15:02:00	43.772		5	16.8	6.8875	-2.01912	91-07	2009-01-13 09:39:00	43.231		4.4	13.5			91-10	2009-01-12 11:11:00	48.752	15.91	9.7	38.4			91-15	2009-01-14 12:32:00	44.848		10.6	11.6			94Q-14	2009-01-12 09:25:00	51.16		4.3	7.28			ABB-02	2009-01-13 11:09:00	47.63	11.48	17	9.9			ABB-03	2009-01-12 15:28:00
91-03	2009-02-16 15:55:00	45.327		5.6	14.5	6.19747	-1.75119	91-07	2009-02-16 14:41:00	44.766		4.4	11.5	4.03051	-2.78107	91-10	2009-02-17 12:34:00	48.965	15.94	9.7	39.8	11.9943	-3.08359	91-15	2009-02-18 10:15:00	43.763		10.5	10.4	7.72855	-0.771324	94Q-14	2009-02-16 10:37:00	51.05		4.7	6.9			ABB-02	2009-02-17 15:03:00	47.449	11.6	20	27.2	8.18134	-5.11841	ABB-03	2009-02-17 12:03:00
91-03	2009-03-18 12:16:00	45.108	9.88	6.5	21	5.92023	-2.13166	91-07	2009-03-18 10:01:00	44.561	9.45	4.4	12.4	3.2749	-2.92165	91-10	2009-03-18 13:50:00	48.346	9.18	13.3	57.3	12.8905	-3.34834	91-15	2009-03-20 10:01:00	43.498	8.43	10.2	11.5	8.49602	-2.04874	94Q-14	2009-03-17 10:08:00	50.819	8.21	4	7.53			ABB-02	2009-03-19 10:33:00	47.216	6.14	24	18.9	7.7664	-4.94018	ABB-03	2009-03-18 09:33:00
91-03	2009-04-07 12:36:00	44.976	10.69	6.5	23.1			91-07	2009-04-16 10:30:00	44.38	10.97	4.5	12.9	3.15664	-3.09251	91-10	2009-04-15 12:56:00	48.399	9.87	13.2	54.7	13.212	-2.41161	91-15	2009-04-17 10:03:00	43.5	9.47	9.1	11.3	8.75307	-0.451698	94Q-14	2009-04-14 10:22:00	51	9.67	4.3	7.35			ABB-02	2009-04-16 12:13:00	47.308	6.64	24	15.9	7.23279	-4.45884	ABB-03	2009-04-07 14:37:00
91-03	2009-05-20 14:02:00	44.955	10.61	7.3	23.7	6.64821	0.906767	91-07	2009-05-15 11:03:00	44.4	9.76	4.5	13.6			91-10	2009-05-15 10:05:00	48.36	8.8	8.9	30.4			91-15	2009-05-15 14:49:00	43.233	8.51	9.5	9.9			94Q-14	2009-05-21 09:44:00	50.762	9.17	4.6	7.98			ABB-02	2009-05-19 11:03:00	47.11	7.38	20	16.9			ABB-03	2009-05-20 13:36:00
91-03	2009-06-17 16:44:00	44.581	11.3	6.4	21	6.33782	-2.19704	91-07	2009-06-17 15:20:00	44.027	12.17	4.5	12.4	3.31913	-3.09143	91-10	2009-06-16 13:05:00	47.949	10.8	8.5	22.6	11.8063	-1.79811	91-15	2009-06-17 09:35:00	42.564	10.66	9.8	11.4	7.62135	-0.200563	94Q-14	2009-06-16 10:19:00	50.38	10.62	4.5	9.7			ABB-02	2009-06-17 13:52:00	46.68	7.41	22	18.6	8.00278	-5.72804	ABB-03	2009-06-16 16:42:00
91-03	2009-07-20 14:27:00	44.051	11.74	4.9	18.5	6.70097	-1.87551	91-07	2009-07-20 15:00:00	43.523		4.4	10.2			91-10	2009-07-20 12:19:00	47.397	12.56	8.1	22.1			91-15	2009-07-22 13:14:00	41.867	11.6	8.6	9.1			94Q-14	2009-07-20 10:31:00	49.779	11.9	4.9	10.4	8.12111	-0.0429248	ABB-02	2009-07-21 12:22:00	46.073	9.19	16	14.2			ABB-03	2009-07-20 13:53:00
91-03	2009-08-13 15:45:00	43.581	9.16	5.6	18.5	6.47585	-2.77257	91-07	2009-08-14 11:18:00	43.052	10	4.6	13.1	4.33176	-2.19811	91-10	2009-08-14 10:42:00	46.934	9.14	12.4	39.8	15.5078	3.40016	91-15	2009-08-18 14:26:00	41.718	9.4	10	9	8.37643	-0.137508	94Q-14	2009-08-13 10:41:00	49.34	9.51	4.9	9.7	7.96592	-1.22141	ABB-02	2009-08-14 15:25:00	45.675	9.38	17.2	13	7.26381	-6.23322	ABB-03	2009-08-13 14:05:00
91-03	2009-09-17 10:41:00	43.152	8.53	6.2	16.4	6.78512	-2.8626	91-07	2009-09-17 09:36:00	42.636	9.66	4.5	11.4	3.82536	-2.60372	91-10	2009-09-16 11:14:00	46.521	8.98	10.8	28.7	13.7187	-1.332	91-15	2009-09-17 14:13:00	41.584	9.94	9	8.9	7.79399	-0.63108	94Q-14	2009-09-16 08:56:00	48.961	9.42	4.8	7.9	8.04253	-0.371248	ABB-02	2009-09-16 15:38:00	45.344	7.04	19	15.2	6.85649	-5.91422	ABB-03	2009-09-17 08:58:00
91-03	2009-10-15 10:51:00	42.864		6.2	17.6	6.9629	-1.82835	91-07	2009-10-15 09:16:00	42.354	9.04	4.7	12.2	3.8731	-3.00816	91-10	2009-10-14 11:28:00	46.318	8.55	13.6	22.4	13.2453	-0.672357	91-15	2009-10-16 12:40:00	41.526		10.4	8.4	6.80416	-1.10325	94Q-14	2009-10-15	48.726						ABB-02	2009-10-15 11:39:00	45.157	7.09	19.1	13.6	7.83748	-3.45415	ABB-03	2009-10-14 15:04:00
91-03	2009-11-17 14:32:00	42.68	8.16	4.9	18	7.76845	-2.02341	91-07	2009-11-17 12:46:00	42.16		4	13			91-10	2009-11-16 11:58:00	46.503	8.37	10.5	19			91-15	2009-11-18 10:38:00	42.61	14.7	9.2	10.1			94Q-14	2009-11-16 09:30:00	49.022		4.5	10.8	7.734	-0.546281	ABB-02	2009-11-17 11:39:00	45.657	6.49	14.1	10			ABB-03	2009-11-16 14:56:00
91-03	2009-12-11 14:53:00	43.28	9.22	3	12.8	7.76897	-2.81329	91-07	2009-12-11 13:38:00	42.671	10.01	3.9	12.7	3.988	-2.3377	91-10	2009-12-11 10:33:00	48.375	10.56	7.7	20.1	9.32619	-2.33662	91-15	2009-12-09 12:35:00	43.564	8.16	10.2	9.6	6.44931	-0.0994573	94Q-14	2009-12-11 09:43:00	50.285	10.17	4.9	9.4	7.27389	-2.42449	ABB-02	2009-12-07 15:11:00	46.804	9.41	14.6	11.3	7.72347	-6.03909	ABB-03	2009-12-11 15:30:00
91-03	2010-01-12 12:21:00	43.867	9.36	4.6	14	7.92071	-1.84218	91-07	2010-01-11 15:20:00	43.281	8.76	4.2	11.3	4.37105	-2.33305	91-10	2010-01-11 12:38:00	48.158	9.64	7.1	46.5			91-15	2010-01-13 13:43:00	44.017	8.66	10	9.3			94Q-14	2010-01-11 11:14:00	50.552	9.46	4.7	9.2	7.80014	-1.45079	ABB-02	2010-01-12 13:52:00	47.107	6.77	15.1	10.6			ABB-03	2010-01-12 12:51:00
91-03	2010-02-09 11:11:00	44.725	9.76	5	14.2			91-07	2010-02-09 10:35:00	44.139	8.48	3.8	10.5			91-10	2010-02-08 12:45:00	48.847	9.76	17	51.3	15.0192	-2.3731	91-15	2010-02-10 14:20:00	43.67	8.64	9.6	9.9	9.39	-1.53	94Q-14	2010-02-08 10:12:00	50.922	9.22	5.3	9.9			ABB-02	2010-02-09 14:09:00	47.272	6.9	16.6	12.9	8.63148	-3.47029	ABB-03	2010-02-08 15:01:00
91-03	2010-03-17 13:22:00	44.914	10.51	5	14	7.40841	-1.19679	91-07	2010-03-17 10:51:00	44.351	8.6	3.2	8.3	4.54834	-1.97629	91-10	2010-03-15 14:27:00	48.598	8.94	12.1	40.1			91-15	2010-03-18 14:43:00	43.588	8.8	8.2	10	8.86446	-0.657553	94Q-14	2010-03-15 12:22:00	50.961	8.57	4.9	9.4	8.4307	-1.06082	ABB-02	2010-03-16 14:23:00	47.305	7.24	16.3	13.8			ABB-03	2010-03-16 10:44:00
91-03	2010-04-13 13:14:00	44.053	10.42	5.9	15.7			91-07	2010-04-13 11:52:00	44.492	9.43	3.7	8.6			91-10	2010-04-12 14:00:00	48.505	10.09	14	52			91-15	2010-04-20 13:54:00	43.458	9.74	9.9	14.8			94Q-14	2010-04-12 11:54:00	51.027	9.55	4.7	9			ABB-02	2010-04-13 14:42:00	47.256	7.2	16.9	13.5	8.53491	-3.09776	ABB-03	2010-04-13 13:38:00
91-03	2010-05-14 15:02:00	45.018	7.98	5.8	15	7.37953	-2.68158	91-07	2010-05-14 13:01:00	44.458	7.76	4	8.9	3.97583	-2.02839	91-10	2010-05-17 12:11:00	48.334	9.45	13	48.8			91-15	2010-05-19 14:50:00	43.213	9.09	11.1	18	9.49678	-0.642848	94Q-14	2010-05-17 09:47:00	50.811	9.1	4.9	8.6	8.38675	-0.866664	ABB-02	2010-05-19 10:00:00	47.073	6.97	16.6	14.5	8.78562	-3.85266	ABB-03	2010-05-17 15:13:00
91-03	2010-06-14 13:40:00	44.841	10.67	5.9	17.9			91-07	2010-06-14 12:03:00	44.288	9.75	4.2	11.3	4.34703	-3.34656	91-10	2010-06-16 13:41:00	48.108	10.58	13.4	61.6	13.4644	0.28499	91-15	2010-06-16 15:40:00	43.191	9.97	12.4	22.7	9.66	-0.38	94Q-14	2010-06-14 10:07:00	50.753	9.47	5.1	10	8.05	-0.32	ABB-02	2010-06-15 12:24:00	47.018	7.6	15.6	15.8			ABB-03	2010-06-14 14:06:00
91-03	2010-07-19 14:15:00	44.336	10.04	5.9	18.4	7.10084	-2.59579	91-07	2010-07-19 13:03:00	43.794	9.69	3.6	9.4	4.46848	-3.34935	91-10	2010-07-20 10:29:00	47.74	9.81	11.6	48.4	13.5948	-0.4081	91-15	2010-07-23 13:22:00	42.347	10.32	10.9	20.8			94Q-14	2010-07-19 10:50:00	50.226	9.32	4.5	9.2	8.11854	-0.78996	ABB-02	2010-07-22 11:34:00	46.467	7.71	18	14.8	8.72705	-2.6742	ABB-03	2010-07-19 15:39:00
91-03	2010-08-10 10:59:00	43.936	9.63	6	28	7.18802	-0.962338	91-07	2010-08-10 09:36:00	43.397	9.84	4.1	15.4	5.4808	-2.96705	91-10	2010-08-10 09:02:00	47.371	9.55	11.8	28.2	13.3324	-0.318356	91-15	2010-08-10 12:15:00	42.057	9.99	14.6	25.1	10.51	-0.79	94Q-14	2010-08-09 08:43:00	49.794	9.23	5.5	7.2			ABB-02	2010-08-09 14:09:00	46.096	7.49	17.7	11.9	8.48989	-2.73906	ABB-03	2010-08-09 12:44:00
91-03	2010-09-16 11:17:00	43.44	9.19	6	23	7.53853	-0.688157	91-07	2010-09-16 09:36:00	42.916	9.88	3.9	12			91-10	2010-09-13 10:20:00	46.84	9.08	9.8	32.6	13.6583	-0.792326	91-15	2010-09-17 10:42:00	41.917	10.11	10.7	17.7	10.4392	-0.997081	94Q-14	2010-09-13 09:41:00	49.349	9.28	5	10.5	8.3029	-0.896315	ABB-02	2010-09-16 14:09:00	45.618	8.03	14	12			ABB-03	2010-09-16 12:44:00
91-03	2010-10-12 14:23:00	43.247	8.67	6	18	7.77274	-2.58868	91-07	2010-10-12 12:57:00	42.716	9.59	4.4	10	5.25621	-2.28626	91-10	2010-10-14 10:29:00	46.721	9.08	9.7	26.3			91-15	2010-10-15 10:29:00	42.339	10.09	11.5	13.4	9.82326	-1.62313	94Q-14	2010-10-13 09:49:00	49.483	9.52	5	7			ABB-02	2010-10-14 12:30:00	45.775	8.07	13.3	10.4			ABB-03	2010-10-12 14:49:00
91-03	2010-11-16 10:54:00	43.089	8.38	5.9	19.1			91-07	2010-11-16 09:40:00	42.541	9.42	4.3	12.5	5.09	-2.5	91-10	2010-11-16 11:22:00	46.879	9.06	9.9	24.9	12.5742	-0.240488	91-15	2010-11-17 12:02:00	42.808	9.89	10.4	16.8	10.49	-1.92	94Q-14	2010-11-15 13:36:00	49.743	9.54	5.1	7.9	8.68136	-1.16836	ABB-02	2010-11-17 09:55:00	46.031	8.26	14.3	12.5	8.34	-1.66	ABB-03	2010-11-16 09:16:00
91-03	2010-12-14 14:46:00	43.248	8.02	6	21	8.35711	-2.60674	91-07	2010-12-14 13:56:00	42.659	8.88	4.3	14	5.96551	-2.71278	91-10	2010-12-14 09:44:00	47.514	8.75	10	28	11.5917	0.0738108	91-15	2010-12-16 11:58:00	44.035	9.34	11	18	10.7042	-1.99632	94Q-14	2010-12-13 10:50:00	50.399	9.19	5.5	11.4	8.02	0.67	ABB-02	2010-12-13 15:12:00	46.646	7.81	17.5	15.2	7.91301	-2.94993	ABB-03	2010-12-14 13:26:00
91-03	2011-01-18 14:24:00	44.678	9.15	6.3	16.8	7.93219	-2.51424	91-07	2011-01-18 13:06:00	44.073	8.96	3.8	9.6			91-10	2011-01-18 09:48:00	49.26	10.03	12.1	56.6	13.6432	-0.695019	91-15	2011-01-19 10:05:00	44.771	8.5	10.1	13.7			94Q-14	2011-01-17 12:44:00	51.729	9.03	6.7	11.6	10.0057	-0.13207	ABB-02	2011-01-19 14:03:00	47.913	7.47	11.5	5			ABB-03	2011-01-18 14:49:00
91-03	2011-02-15 12:12:00	46.351	11.44	6.5	18.1			91-07	2011-02-15 10:56:00	45.747	9.25	4.2	9.9	6.19088	-2.1078	91-10	2011-02-16 09:59:00	50.194	10.88	12.5	49.2	14.3076	-2.40925	91-15	2011-02-23 15:16:00	44.266	8.29	10	11.8	9.72608	-0.512439	94Q-14	2011-02-23 11:56:00	52.08	8.88	5	8.2	8.01	-1.76	ABB-02	2011-02-16 11:54:00	48.104	8.14	27	12.6	8.26054	-3.52386	ABB-03	2011-02-15 14:59:00
91-03	2011-03-16 16:07:00	46.491	11.05	8.1	21.4	8.39013	-2.16466	91-07	2011-03-16 13:34:00	45.927	9.66	4.1	11.4			91-10	2011-03-16 10:38:00	49.644	10.68	12.7	48.8	14.5514	-2.38701	91-15	2011-03-22 15:27:00	43.861	8.99	10.2	13.9			94Q-14	2011-03-16 11:53:00	51.819	9.59	5.5	7.72	8.35268	-1.22281	ABB-02	2011-03-23 09:48:00	47.713	7.85	21	13.3			ABB-03	2011-03-15 15:23:00
91-03	2011-04-20 10:35:00	46.437	10.74	5.8	19.5	7.6	-0.03	91-07	2011-04-18 13:21:00	45.799	9.55	5	15.1	6.80207	-2.94372	91-10	2011-04-21 10:19:00	49.816	10.86	13	42.6	12.6683	-3.21412	91-15	2011-04-20 15:17:00	43.918	9.6	9.4	10.3	8.19128	-2.78895	94Q-14	2011-04-18 15:02:00	52.033	9.34	5.4	8.7			ABB-02	2011-04-20 12:01:00	47.832	7.79	19	8.4	7.92827	-2.26636	ABB-03	2011-04-20 11:03:00
91-03	2011-05-17 14:26:00	46.535	11.44	6.2	24.7	8.24626	-1.25496	91-07	2011-05-17 13:13:00	45.966	10.52	5.1	14.5	6.31	-3.18	91-10	2011-05-17 10:31:00	49.744	10.87	12.5	40.6			91-15	2011-05-19 11:09:00	44.008	9.71	14.1	15.8			94Q-14	2011-05-17 09:50:00	52.114	9.53	5.5	8.9	8.79121	-0.813599	ABB-02	2011-05-18 11:14:00	47.848	8.34	20	12	7.04	-3.39	ABB-03	2011-05-17 14:50:00
91-03	2011-06-22 10:35:00	46.408	10.54	6.2	28.6	7.42	-1.68	91-07	2011-06-22 13:21:00	45.84	11.01	4.9	15.3	6.12371	-2.98219	91-10	2011-06-22 10:31:00	49.366	10.13	13.2	42.4	11.4319	-1.32285	91-15	2011-06-20 14:25:00	43.304	10.22	11.7	15.2	8.88357	-1.25921	94Q-14	2011-06-22 15:02:00	51.431	9.61	6.9	12			ABB-02	2011-06-23 14:48:00	47.364	8.68	17.5	10.4	7.17881	-2.4833	ABB-03	2011-06-22 14:50:00
91-03	2011-07-18 14:37:00	45.913	10.19	5.4	21.1	6.53	-2.48	91-07	2011-07-18 13:20:00	45.355	9.88	5	13.7			91-10	2011-07-18 11:27:00	48.743	9.93	9.6	27.4	10.6068	-0.534079	91-15	2011-07-20 16:01:00	42.797	9.52	10.9	13.2	8.28	-2.32	94Q-14	2011-07-19 13:30:00	50.979	9.09	5.8	8	9.28952	-0.991902	ABB-02	2011-07-19 11:24:00	47.029	7.98	15.4	10.5			ABB-03	2011-07-18
91-03	2011-08-16 15:35:00	45.281	9.88	5.4	19.6	6.92577	-3.19934	91-07	2011-08-16 14:15:00	44.742	10.15	5.2	13.3	6.76723	-2.47133	91-10	2011-08-16 09:56:00	49.166	9.88	8.5	25.4	9.72526	-0.681478	91-15	2011-08-17 09:30:00	42.293	10.4	9.6	10.8	9.56708	-2.02194	94Q-14	2011-08-15 12:46:00	50.553	9.24	5	7			ABB-02	2011-08-17 14:17:00	46.598	8.56	15.8	11.1	8.25163	-2.96612	ABB-03	2011-08-16
91-03	2011-09-27 13:51:00	44.398	9.18	5.6	19.4			91-07	2011-09-27 12:43:00	43.856	9.87	5	12.8			91-10	2011-09-26 13:08:00	47.422	9.51	9	34.6	15.4606	0.0843956	91-15	2011-09-29 11:15:00	41.949	9.92	9.5	11.9			94Q-14	2011-09-27 15:45:00	49.841	9.48	6	7.8	8.55368	-0.896961	ABB-02	2011-09-27 14:58:00	46.054	8.1	18	16.2			ABB-03	2011-09-27
91-03	2011-10-19	44.097	9.03	5.5	17.2	7.09821	-2.66536	91-07	2011-10-19	43.565	9.97	4.9	14.8	6.2552	-2.76048	91-10	2011-10-18 11:40:00	47.139	9.41	8.9	24.9	14.72	0.285977	91-15	2011-10-19	42.018	9.92	8.9	9.9	9.13049	-2.4073	94Q-14	2011-10-19	49.692	9.67	5.7				ABB-02	2011-10-19	45.971	8.65	16	13	9.32053	-1.97477	ABB-03	2011-10-18
91-03	2011-11-16 13:22:00	43.782	8.9	5.7	16.1			91-07	2011-11-16 13:56:00	43.252	10.15	5	14.1			91-10	2011-11-17	46.947	8.93	8.3	20.5	13.5672	1.72134	91-15	2011-11-14 14:12:00	42.154	10.52	8.5	11			94Q-14	2011-11-16 09:48:00	49.594	10	5.5	5.84	8.02363	-0.657525	ABB-02	2011-11-17	45.994	8.54	17.5	12.6			ABB-03	2011-11-16
91-03	2011-12-13	43.779	8.45	6	14.2	6.64824	-3.97866	91-07	2011-12-13	43.203	9.57	5	15.9	6.53872	-3.19159	91-10	2011-12-13	47.587	9.07	7.7	17.6	11.4276	-1.13709	91-15	2011-12-12	42.821	9.14	7.9	9.8	9.3369	-2.63253	94Q-14	2011-12-12	50.14	9.71	4.6	6.24			ABB-02	2011-12-12	46.544	8.93	14.5	7.94	8.603	-1.4508	ABB-03	2011-12-13
91-03	2012-01-17	43.889	8.61	5.8	12.9			91-07	2012-01-17	43.309	9.58	5.8	14.7			91-10	2012-01-23	47.935	9.12	7.6	28.2	13.0479	1.13279	91-15	2012-01-24	43.307	8.68	6.4	6.8	9.56	-2.58	94Q-14	2012-01-17	50.395	9.87	4.9	6.76	8.27642	-1.27436	ABB-02	2012-01-23	46.833	8.05	13.8	12.4	8.22	-1.48	ABB-03	2012-01-17
91-03	2012-02-13	44.348	8.37	5.5	15.5	6.7909	-2.9807	91-07	2012-02-13	43.721	9.16	4.8	18.1	6.79096	-3.0405	91-10	2012-02-15	48.638	9.61	7.2	23.6	14.4123	-0.138794	91-15	2012-02-16	43.595	8.92	9.9	7.9	10.1595	-2.27703	94Q-14	2012-02-16	50.871	9.76	5.6	6.1			ABB-02	2012-02-16	47.211	7.96	15	11.7	8.04908	-1.83249	ABB-03	2012-02-13
91-03	2012-03-15	45.06	9.32	6.1	14.2	6.71	-0.62	91-07	2012-03-15	44.444	9.1	5	14.3	6.8	-2.31	91-10	2012-03-15	49.085	9.51	7.7	22.5	15.1	-1.28	91-15	2012-03-12	44.14	8.75	13.4	9.7	10.45	-1.46	94Q-14	2012-03-12	51.43	9.8	4.9	7	7.9334	-1.57146	ABB-02	2012-03-16	47.752	7.77	24	12.9	8.1	-2.05	ABB-03	2012-03-12
91-03	2012-04-25	45.923	10.7	6.4	16.1	6.8	-1.93	91-07	2012-04-23	45.34	9.38	4.6	12.7			91-10	2012-04-19	49.384	10.61	8.1	25.7	14.32	-0.36	91-15	2012-04-25	43.802	9.38	9.9	7.75	8.98	-2.22	94Q-14	2012-04-19	51.531	10.16	4.9	6.01	7.73	-1.35	ABB-02	2012-04-23	47.636	7.5	29	14	8.16	-3.79	ABB-03	2012-04-23
91-03	2012-05-15	45.98	10.19	6.7	16.1	7.06	-2.08	91-07	2012-05-15	45.391	9.5	4.8	11	5.99	-1.66	91-10	2012-05-15	49.287	10.05	7.8	28.9	13.28	-1.3	91-15	2012-05-17	43.507	9.42	13	9.19	8.86	-0.84	94Q-14	2012-05-15	51.495	9.59	5.4	6.25	8.42	-0.63	ABB-02	2012-05-16	47.508	7.74	16.4	12.9	8.15	-1.89	ABB-03	2012-05-15
91-03	2012-06-18	45.772	10.17	5.2	14.5			91-07	2012-06-18	45.215	9.9	4.8	9.7			91-10	2012-06-19	48.695	9.93	8.1	30	12.61	0	91-15	2012-06-21	43.12	9.91	13.1	10.9	8.04	-1.9	94Q-14	2012-06-19	51.051	9.38	5.5	7.12	7.62	-0.96	ABB-02	2012-06-21	47.181	7.43	19	15.1			ABB-03	2012-06-18
91-03	2012-07-16	45.395	10.22	5.2	14.6	7.01	-1.47	91-07	2012-07-16	44.839	9.77	5.2	11.7	6.21	-2.14	91-10	2012-07-17	48.429	10.31	11.2	39	13.83	-0.74	91-15	2012-07-24	42.825	9.91	13	12	8.14	-0.54	94Q-14	2012-07-17	50.858	9.56	5.8	5.94	7.77	-1.95	ABB-02	2012-07-17	46.976	7.46	20	16.8	8.25	-2.81	ABB-03	2012-07-24
91-03	2012-08-21	44.768	9.37	5	11.5			91-07	2012-08-21	44.22	9.48	4.7	9.5			91-10	2012-08-23	47.85	9.72	10.1	32.8	16.21	0.51	91-15	2012-08-22	42.292	10.31	12.8	13.6			94Q-14	2012-08-21	50.299	9.34	5.2	5.15	8.22	0.08	ABB-02	2012-08-23	46.451	7.67	22	18.8			ABB-03	2012-08-22
91-03	2012-09-24	44.139	9.23	4.7	13	6.99	-2.37	91-07	2012-09-24	43.602	9.82	4.2	12.8	6.34	-4.26	91-10	2012-09-25	47.259	9.16	9.9	26.3	15.46	1.42	91-15	2012-09-27	41.782	9.64	11.1	10.7	8.5	-1.62	94Q-14	2012-09-25	49.683	9.33	6.5	5.98	6.63	-0.92	ABB-02	2012-09-27	45.895	7.52	20	19.9	8.43	-2.59	ABB-03	2012-09-24
91-03	2012-10-23	43.723	9.03	6.2	13.2			91-07	2012-10-23	43.2	9.54	4.3	12.9			91-10	2012-10-29	46.812	8.78	8.4	19.5	13.39	1.06	91-15	2012-10-25	41.944	9.64	10.9	11.5			94Q-14	2012-10-29	49.512	9.56	4.9	5.27			ABB-02	2012-10-25	45.755	7.74	20	18			ABB-03	2012-10-23
91-03	2012-11-20	43.86	8.5	5.7	12.8	7.29	-1.02	91-07	2012-11-20	43.284	9.22	4.9	13.4	7.99	-1.14	91-10	2012-11-21	47.798	8.88	7.9	15.9	10.3	0.76	91-15	2012-11-21	43.42	9.54	11.4	11.7	8.33	-2.47	94Q-14	2012-11-20	50.4	9.18	4.9	5	6.54	0.43	ABB-02	2012-11-21	46.829	7.44	21	16.4	8.54	-3.61	ABB-03	2012-11-19
91-03	2012-12-19	44.784	8.62	5.7	14.3			91-07	2012-12-17	44.096	9.31	4.4	16.4			91-10	2012-12-17	49.084	9.52	6.8	21.4	12.94	-1.16	91-15	2012-12-21	44.282	9.23	10	9.7			94Q-14	2012-12-21	51.416	9.1	5.1	5			ABB-02	2012-12-19	47.618	7.01	24	18			ABB-03	2012-12-19
91-03	2013-01-14	45.744	10.77	4.7	13.2	6.59	-0.65	91-07	2013-01-14	45.127	8.99	5.4	21.3	7	-1.14	91-10	2013-01-24	49.806	9.96	8.3	34.4	13.05	-1.45	91-15	2013-01-24	44.056	9.08	11	9.78	9.16	-3.11	94Q-14	2013-01-16	51.89	9.25	4.6	5.1	6.12	-0.46	ABB-02	2013-01-24	47.854	8.42	33	16.6	6.96	-3.56	ABB-03	2013-01-14
91-03	2013-02-14	46.165	10.15	4.9	13.6			91-07	2013-02-14	45.593	8.97	6.7	23	8.13	-1.12	91-10	2013-02-14	49.461	9.61	10.5	34.9	13.86	-1.79	91-15	2013-02-12	43.882	8.97	10.9	8			94Q-14	2013-02-14	51.19	9.36	5	4.78			ABB-02	2013-02-14	47.71	8.26	28	14.7			ABB-03	2013-02-14
91-03	2013-03-12	46.246	10.05	5	14	7.4	0.69	91-07	2013-03-12	45.637	9.86	7	26	8.73	-1.31	91-10	2013-03-13	49.719	10.43	7.9	33.5	12.96	-1.27	91-15	2013-03-12	44.037	9.78	9	9	8.24	-1.17	94Q-14	2013-03-12	51.921	9.73	6	5	5.84	-2.72	ABB-02	2013-03-12	47.963	8.42	6	13	7.55	-2.78	ABB-03	2013-03-12
[truncated: 102 more columns]
